# Supplementary material
Source: Springer Nature journal article supplement (https://www.springermedizin.de/resource/supplementary/13000_2012_516_MOESM2_ESM.pdf/9624894)

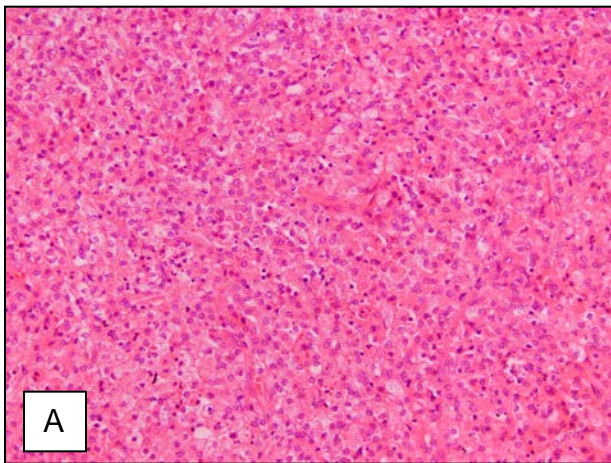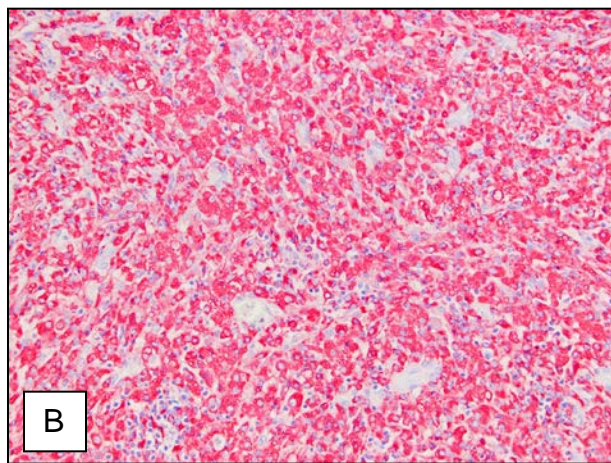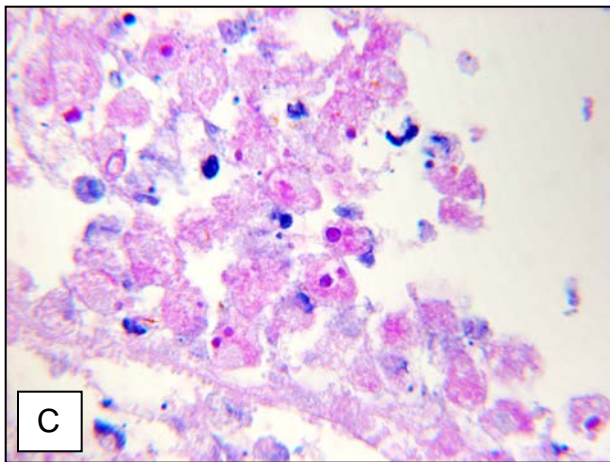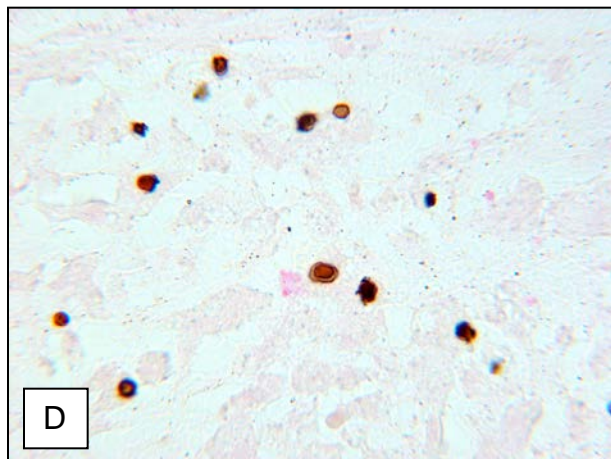

Supplement: MOESM2 [file 9624894]
